# Supplementary material for: Identification of Novel Thiazolo[5,4-b]Pyridine Derivatives as Potent Phosphoinositide 3-Kinase Inhibitors
Source: PubMed Central journal article supplement (PMC7594053; doi:10.3390/molecules25204630), 2020-10-12
Supplement: molecules-25-04630-s001.pdf [file molecules-25-04630-s001.pdf]

# Supporting Information

## Identification of Novel Thiazolo[5,4-b]Pyridine Derivatives as Potent Phosphoinositide 3-Kinase Inhibitors

Liang Xia <sup>1,2</sup>, Yan Zhang<sup>1,2</sup>, Jingbo Zhang<sup>1,2</sup>, Songwen Lin <sup>1,2</sup>, Kehui Zhang <sup>1,2</sup>, Hua  
Tian<sup>1,2</sup>, Yi Dong <sup>1,2,\*</sup> and Heng Xu <sup>1,2,\*</sup>

<sup>1</sup> State Key Laboratory of Bioactive Substance and Function of Natural Medicines, Institute of Materia Medica, Chinese Academy of Medical Sciences and Peking Union Medical College, Beijing 100050, China.

<sup>2</sup> Beijing Key Laboratory of Active Substances Discovery and Druggability Evaluation, Institute of Materia Medica, Chinese Academy of Medical Sciences and Peking Union Medical College, Beijing 100050, China

E-mail: dongyi@imm.ac.cn; xuheng@imm.ac.cn

## Table of cotent

|                                                                                                                                                                                      |         |
|--------------------------------------------------------------------------------------------------------------------------------------------------------------------------------------|---------|
| <i><sup>1</sup>H NMR, <sup>13</sup>C NMR, HPLC spectrum of 2,4-difluoro-N-(2-methoxy-5-(7-morpholinothiazolo[5,4-b]pyridin-2-yl)pyridin-3-yl)benzenesulfonamide (19a)</i> .....      | S1-S3   |
| <i><sup>1</sup>H NMR, <sup>13</sup>C NMR, HPLC spectrum of 2-chloro-4-fluoro-N-(2-methoxy-5-(7-morpholinothiazolo[5,4-b]pyridin-2-yl)pyridin-3-yl)benzenesulfonamide (19b)</i> ..... | S4- S6  |
| <i><sup>1</sup>H NMR, <sup>13</sup>C NMR, HPLC spectrum of (5-chloro-N-(2-methoxy-5-(7-morpholinothiazolo[5,4-b]pyridin-2-yl)pyridin-3-yl)thiophene-2-sulfonamide (19c)</i> .....    | S7-S9   |
| <i><sup>1</sup>H NMR, <sup>13</sup>C NMR, HPLC spectrum of 4-(2-(6-methoxypyridin-3-yl)thiazolo[5,4-b]pyridin-7-yl)Morpholine (19d)</i> .....                                        | S10-S12 |
| <i><sup>1</sup>H NMR, <sup>13</sup>C NMR, HPLC spectrum of 2,4-difluoro-N-(2-methoxy-5-(7-morpholinothiazolo[5,4-b]pyridin-2-yl)phenyl)benzenesulfonamide (19e)</i> .....            | S13-S15 |
| <i><sup>1</sup>H NMR, <sup>13</sup>C NMR, HPLC spectrum of 2,4-difluoro-N-(5-(7-morpholinothiazolo[5,4-b]pyridin-2-yl)pyridin-3-yl)benzenesulfonamide (19f)</i> .....                | S16-S18 |

<sup>1</sup>H NMR spectrum of **19a**

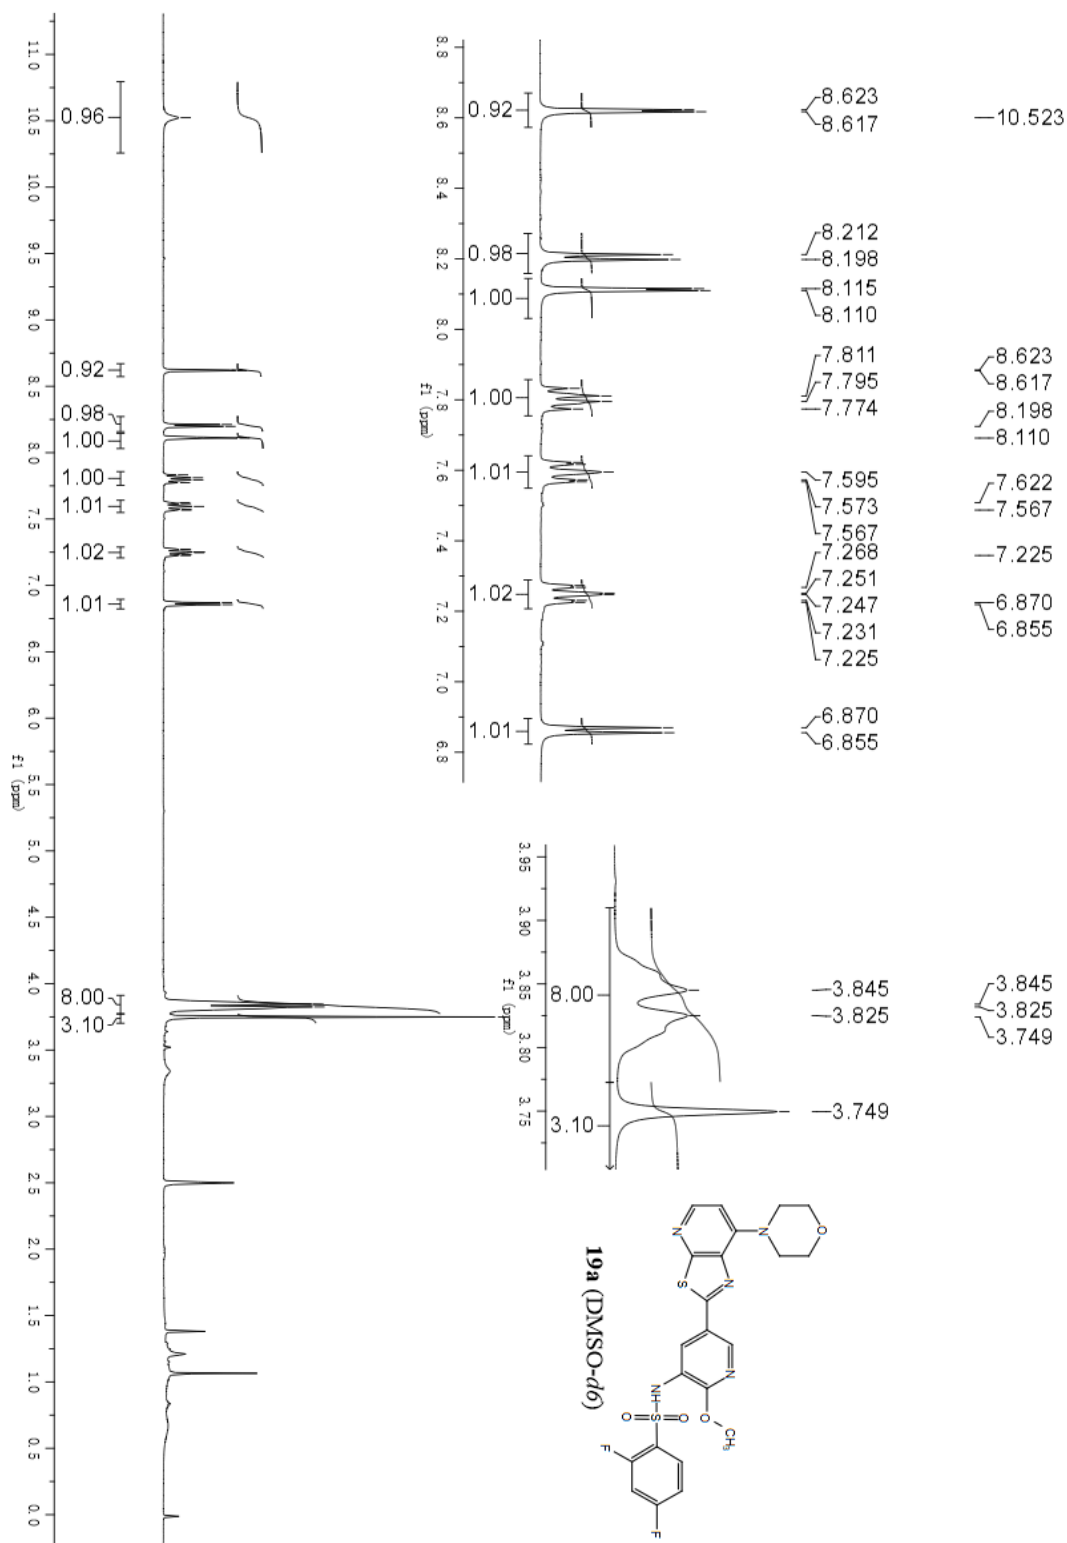

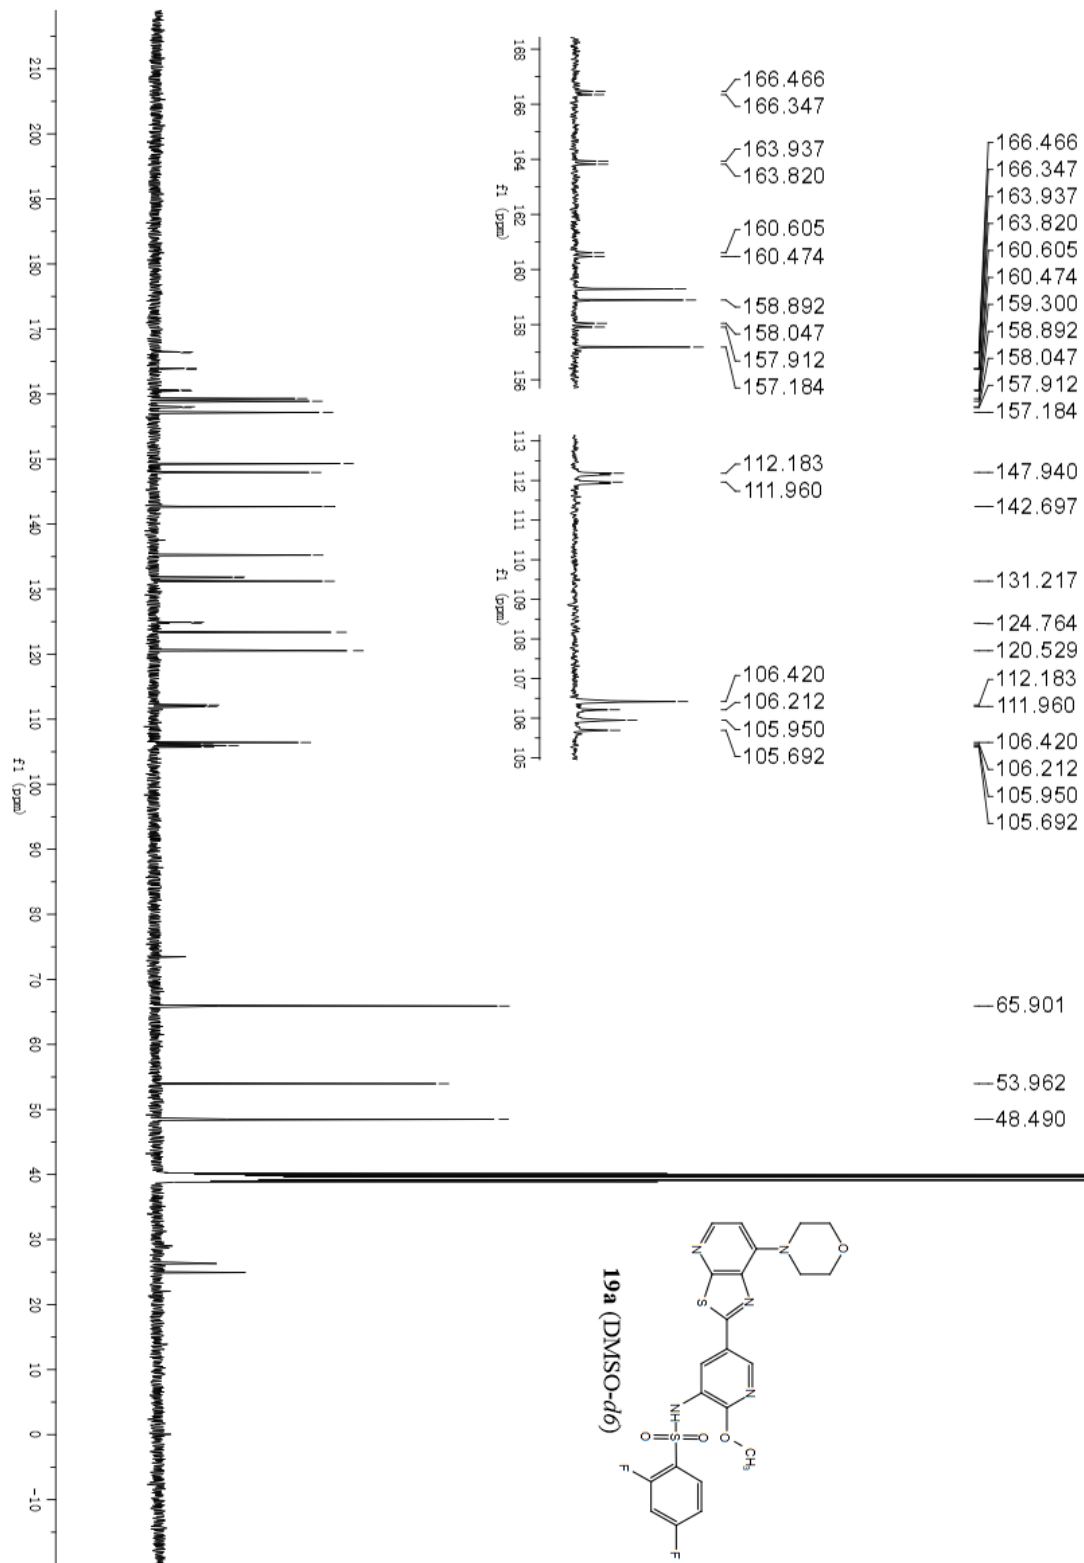

HPLC spectrum of 19a

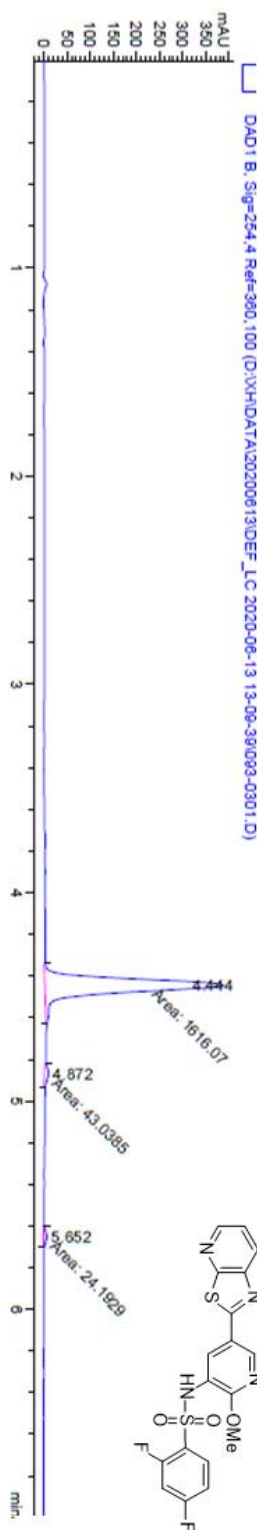

Signal 2: DAD1 B, Sig=254,4 Ref=360,100

| Peak # | RetTime [min] | Type | Width [min] | Area [mAU*s] | Height [mAU] | Area %  |
|--------|---------------|------|-------------|--------------|--------------|---------|
| 1      | 4.444         | MM   | 0.0692      | 1616.07092   | 388.99686    | 96.0060 |
| 2      | 4.872         | MM   | 0.0801      | 43.03851     | 8.95479      | 2.5568  |
| 3      | 5.652         | MM   | 0.0630      | 24.19288     | 6.39731      | 1.4372  |

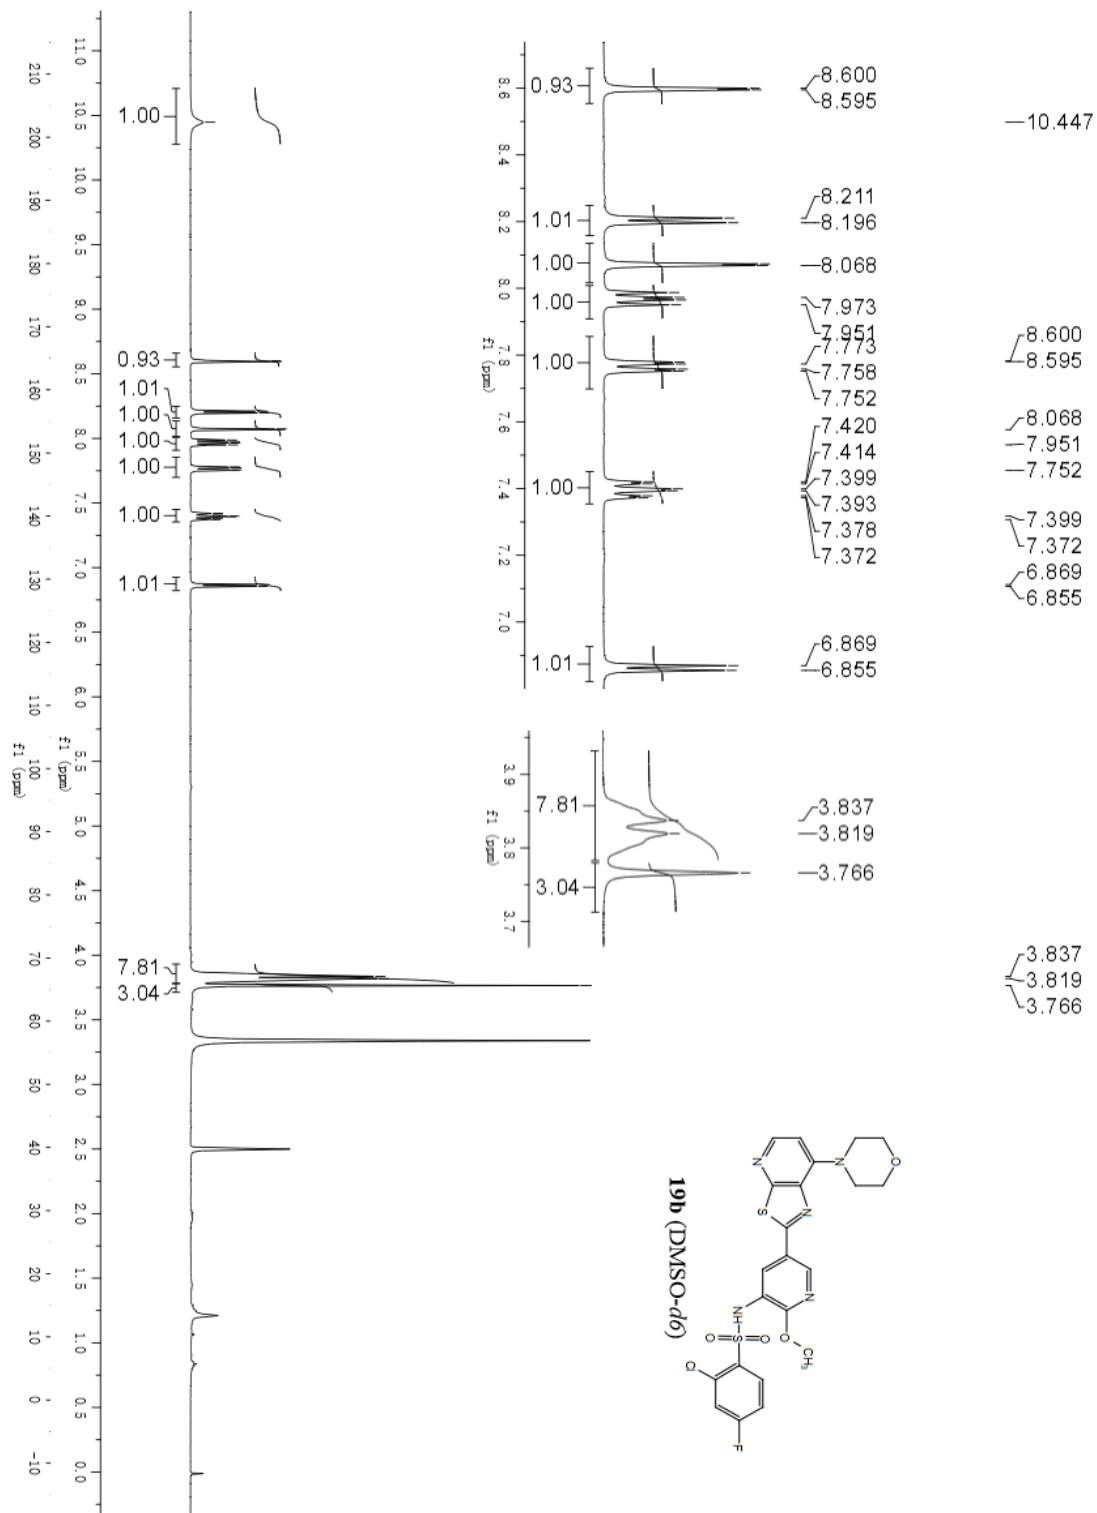

<sup>13</sup>C NMR spectrum of **19b**

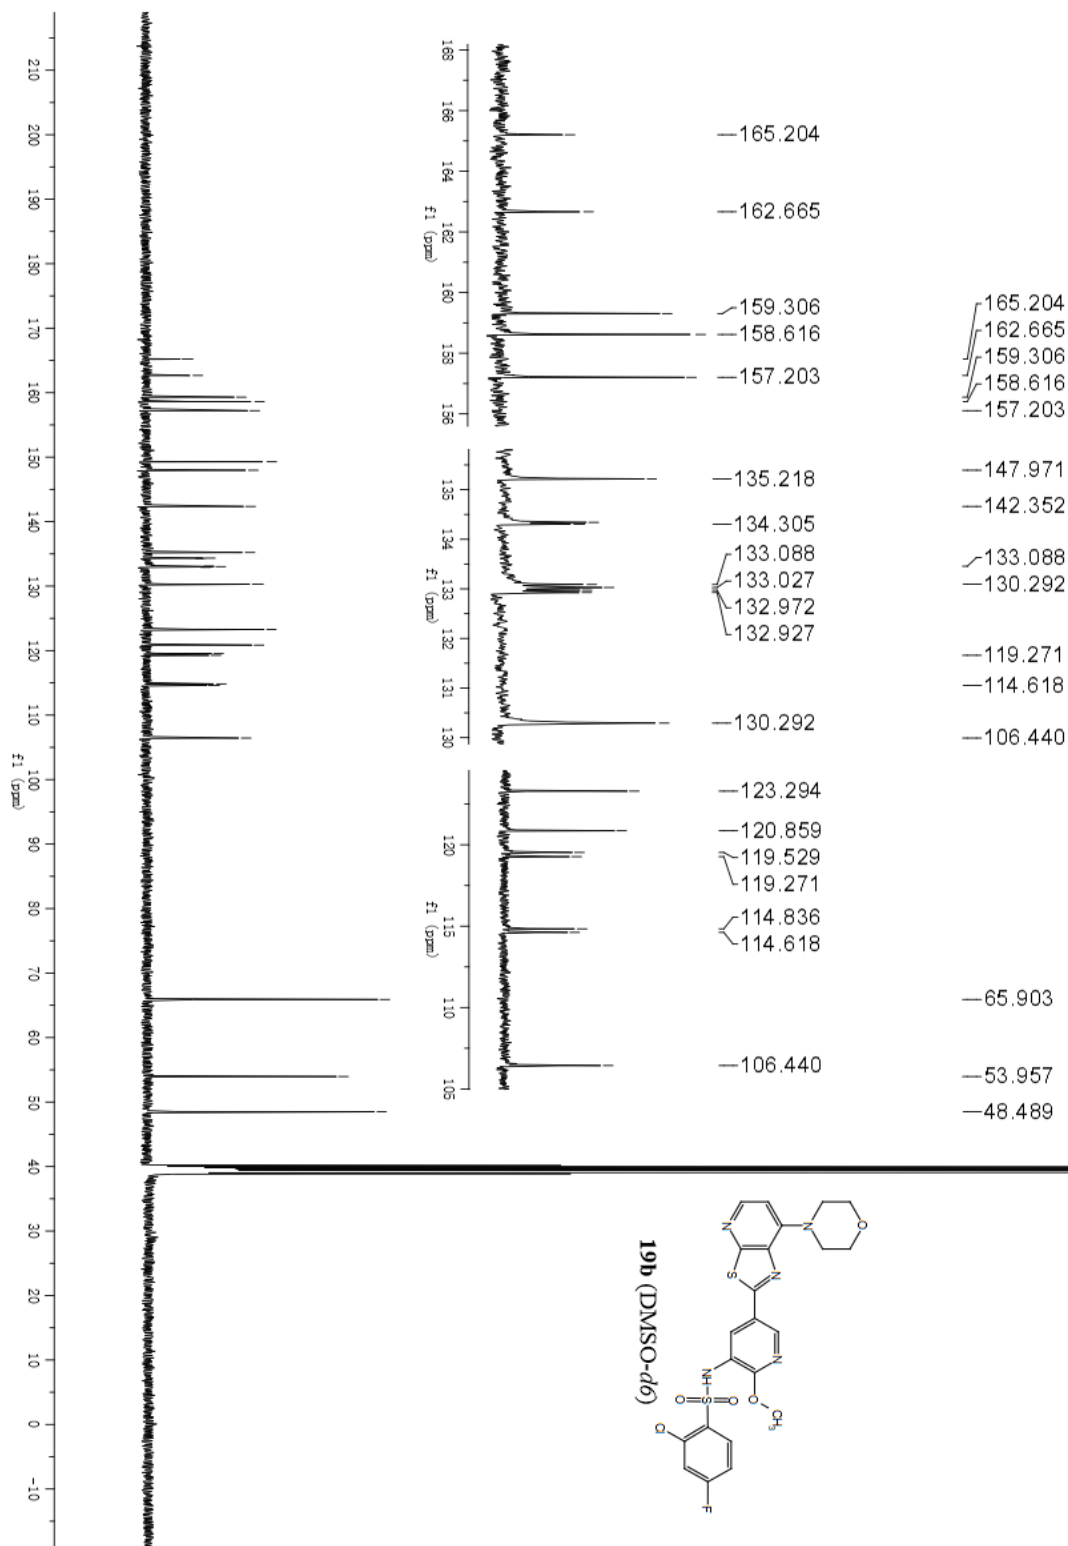

HPLC spectrum of 19b

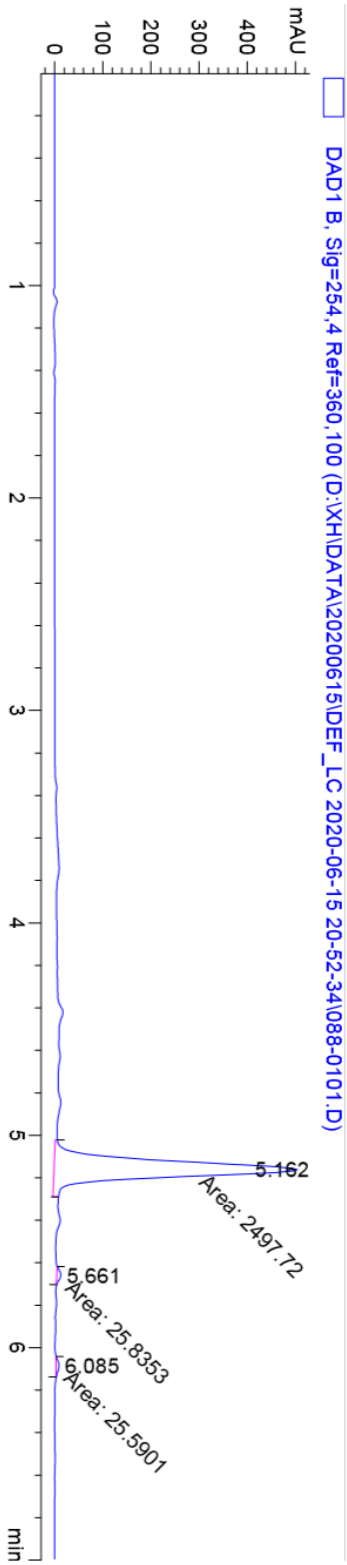



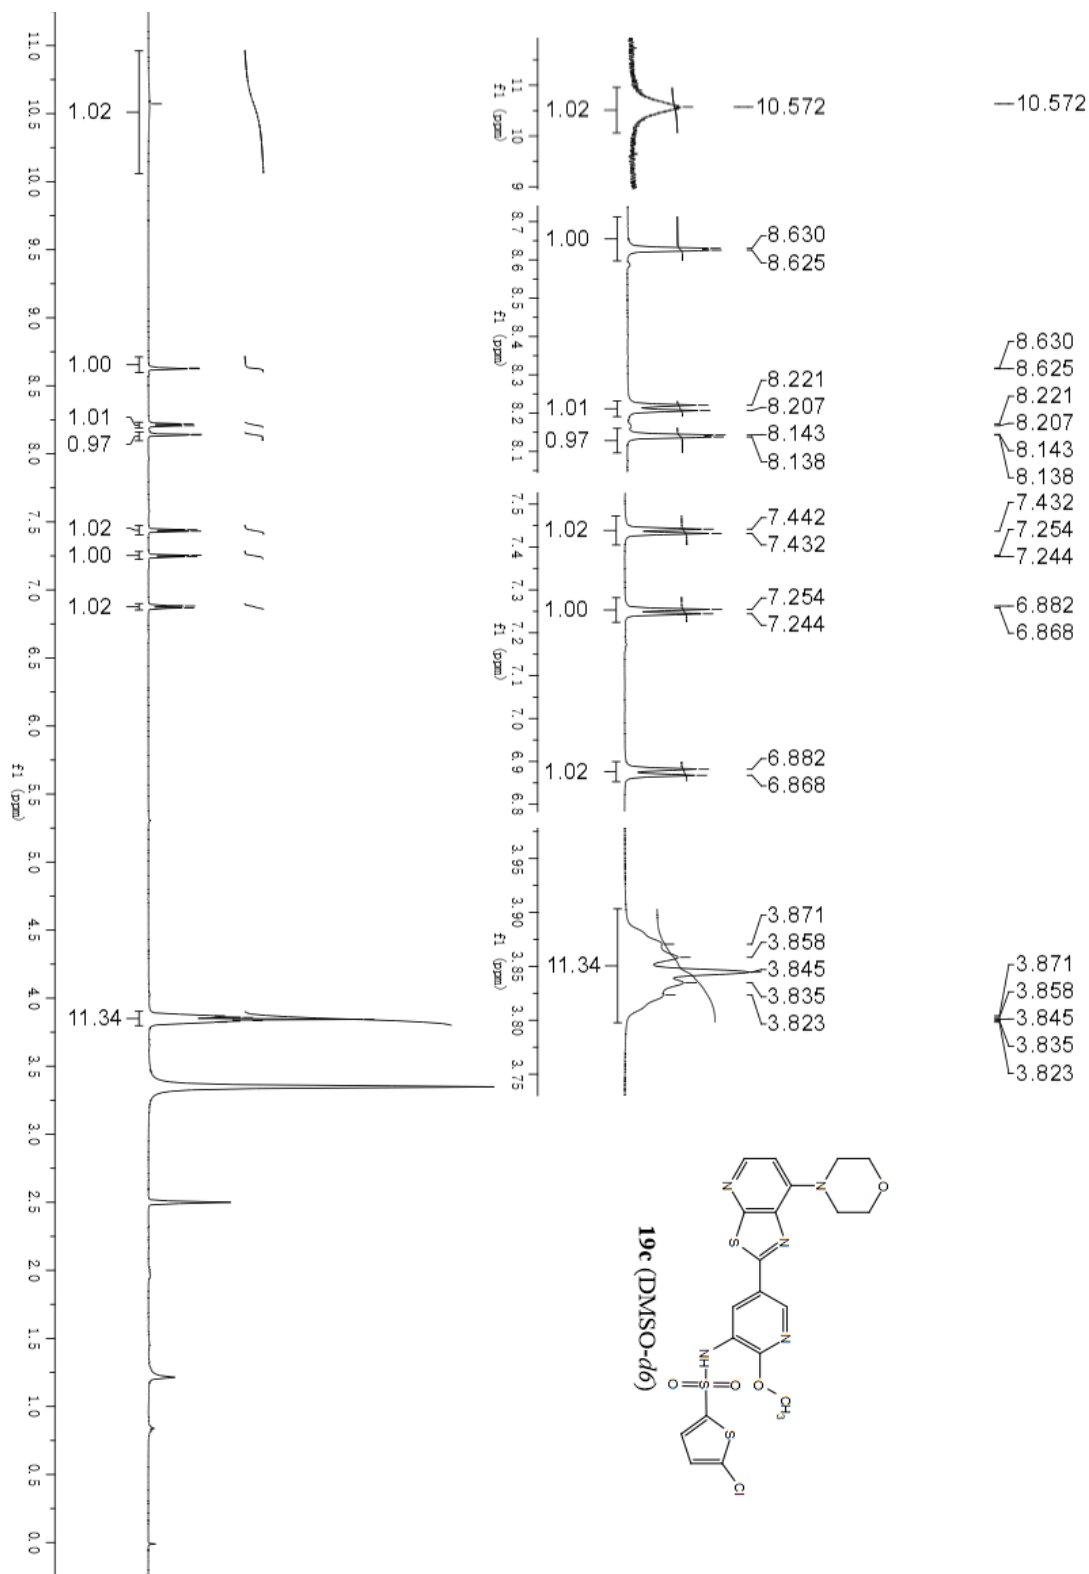

<sup>13</sup>C NMR spectrum of 19c

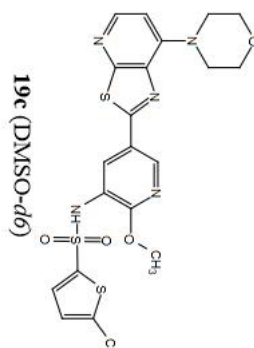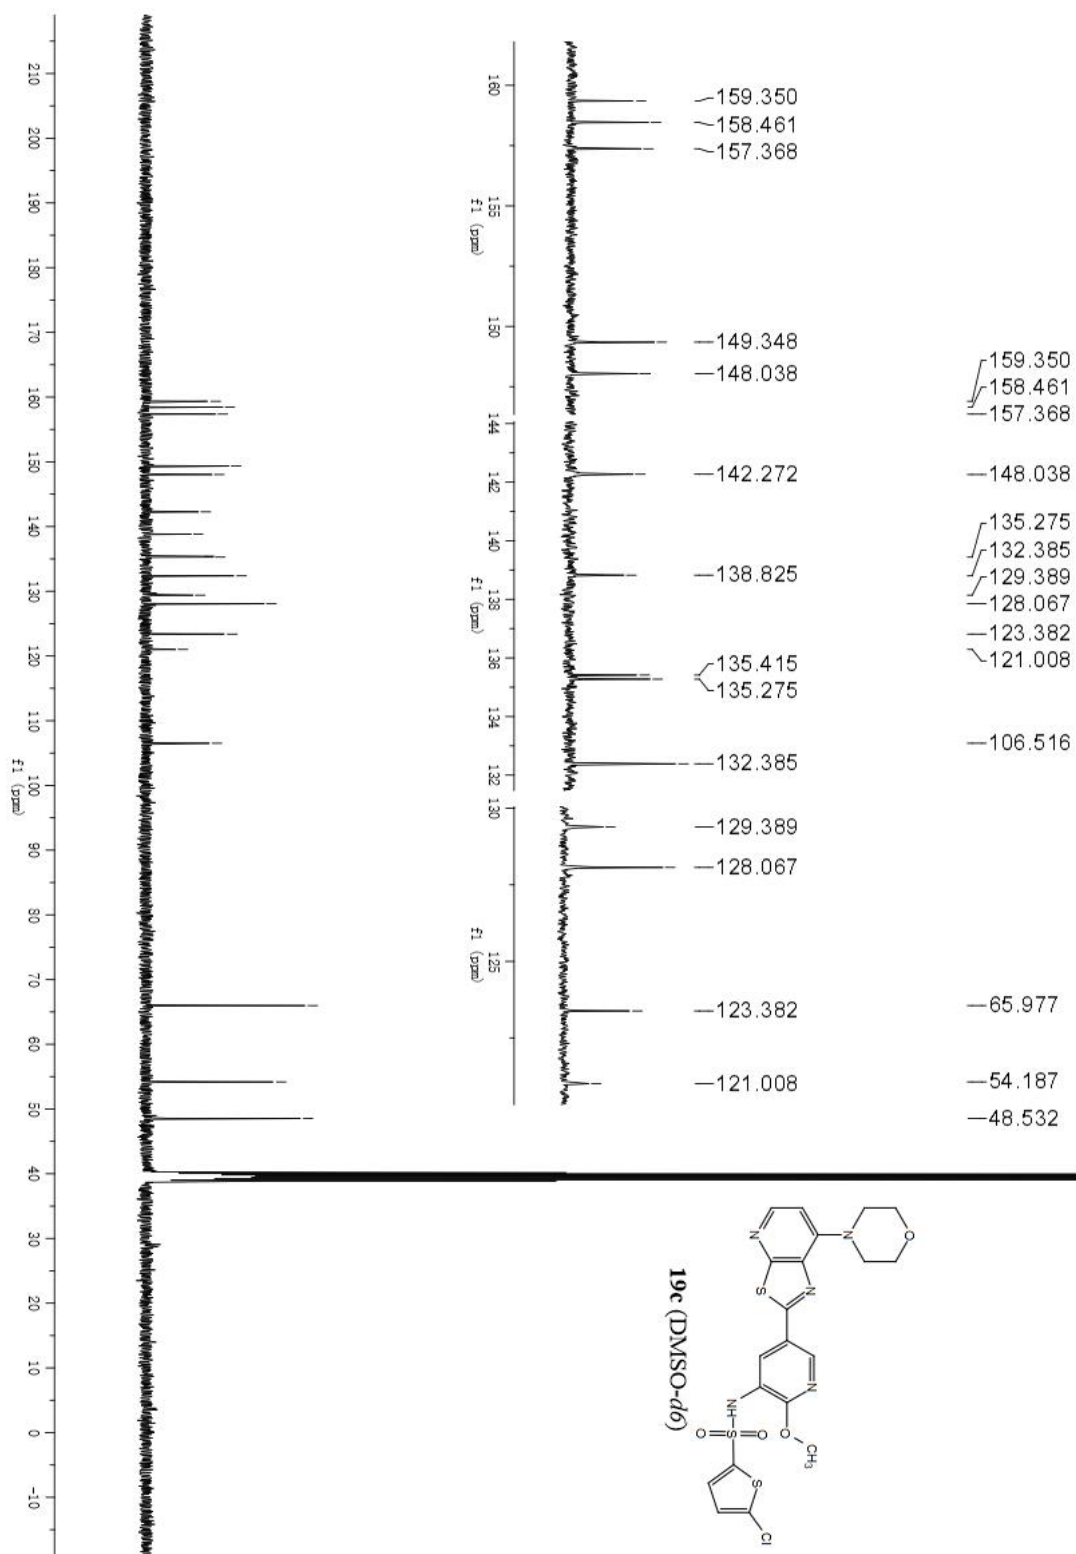

HPLC spectrum of 19c

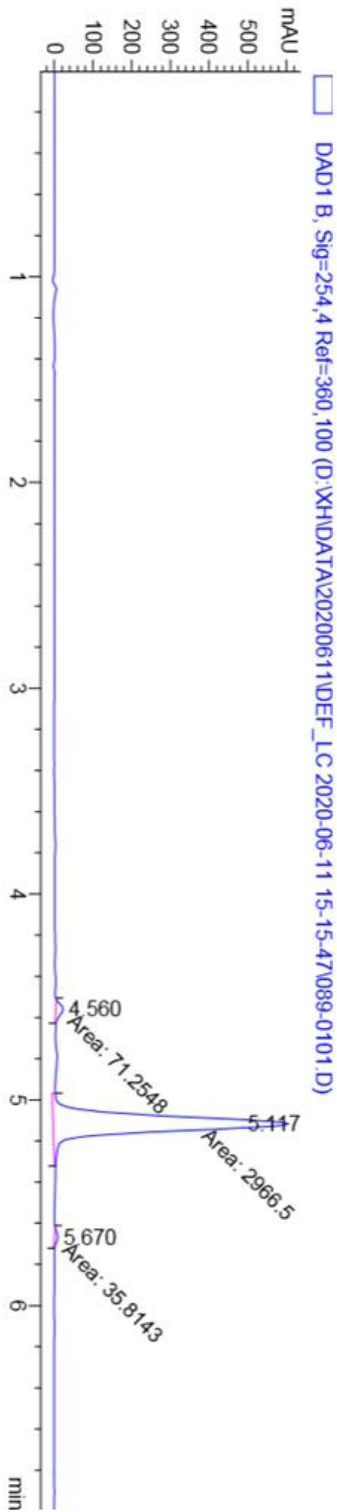

Signal 2: DAD1 B, Sig=254, 4 Ref=360, 100

| Peak # | RetTime [min] | Type | Width [min] | Area [mAU*s] | Height [mAU] | Area %  |
|--------|---------------|------|-------------|--------------|--------------|---------|
| 1      | 4.560         | MM   | 0.0651      | 71.25484     | 18.23404     | 2.3183  |
| 2      | 5.117         | MM   | 0.0810      | 2966.49585   | 610.17664    | 96.5165 |
| 3      | 5.670         | MM   | 0.0655      | 35.81426     | 9.11627      | 1.1652  |

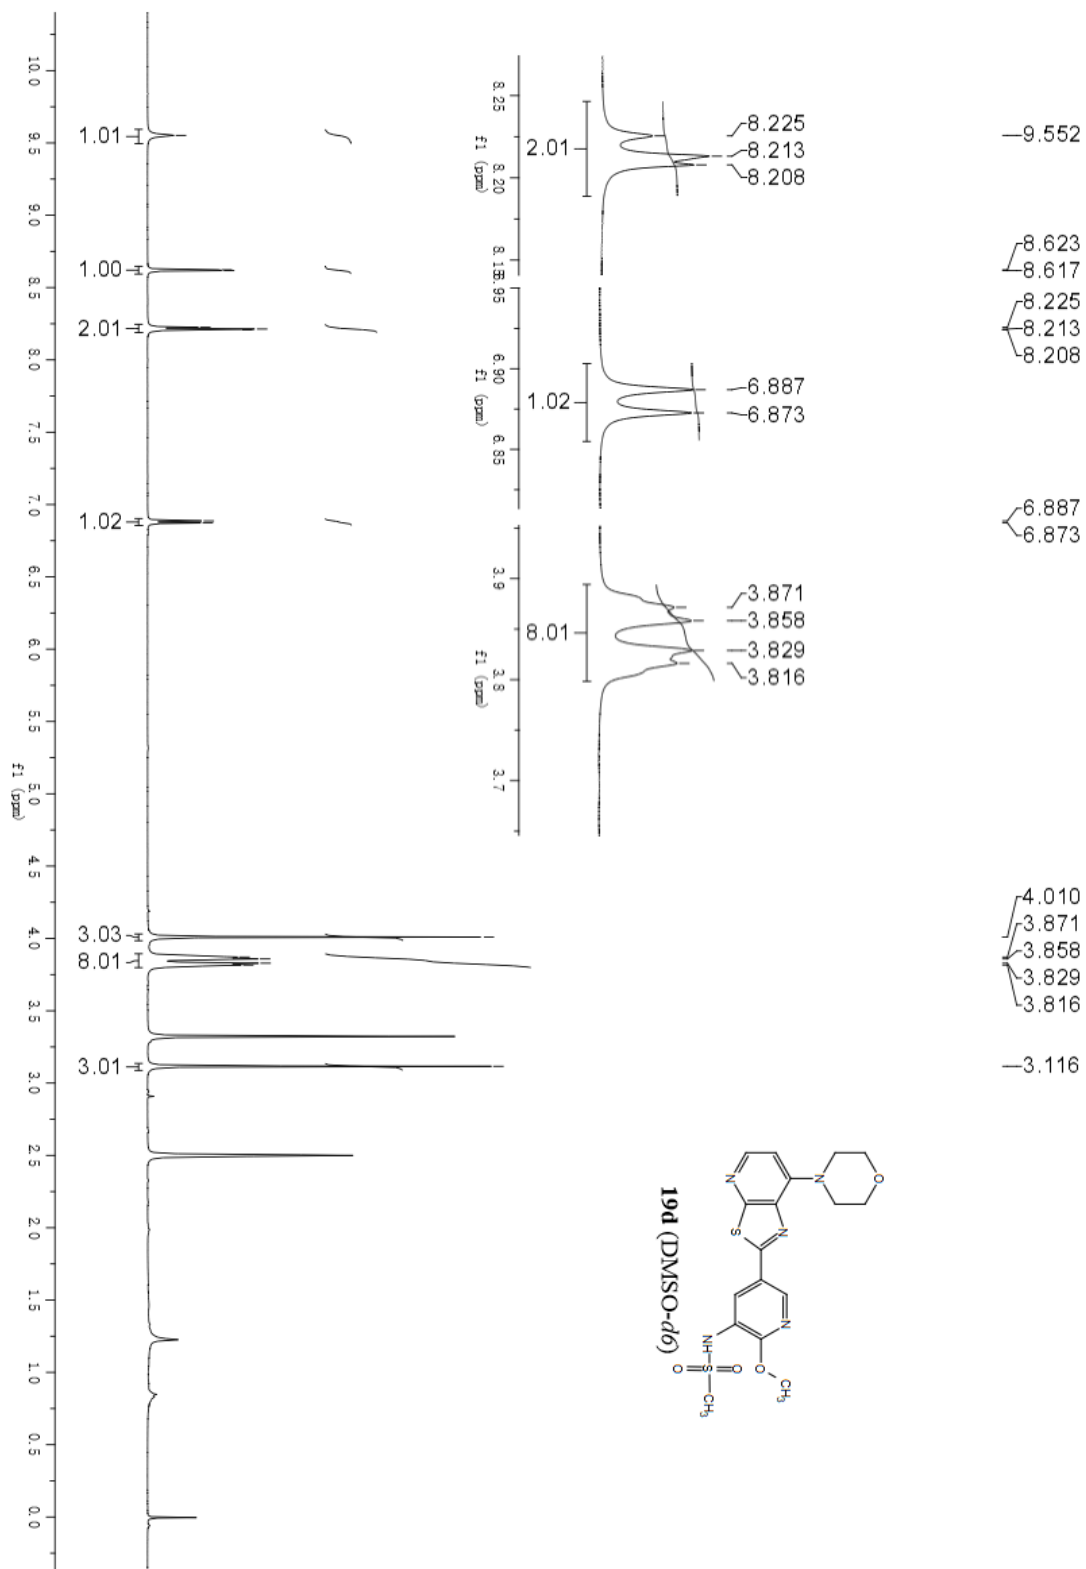

<sup>13</sup>C NMR spectrum of **19d**

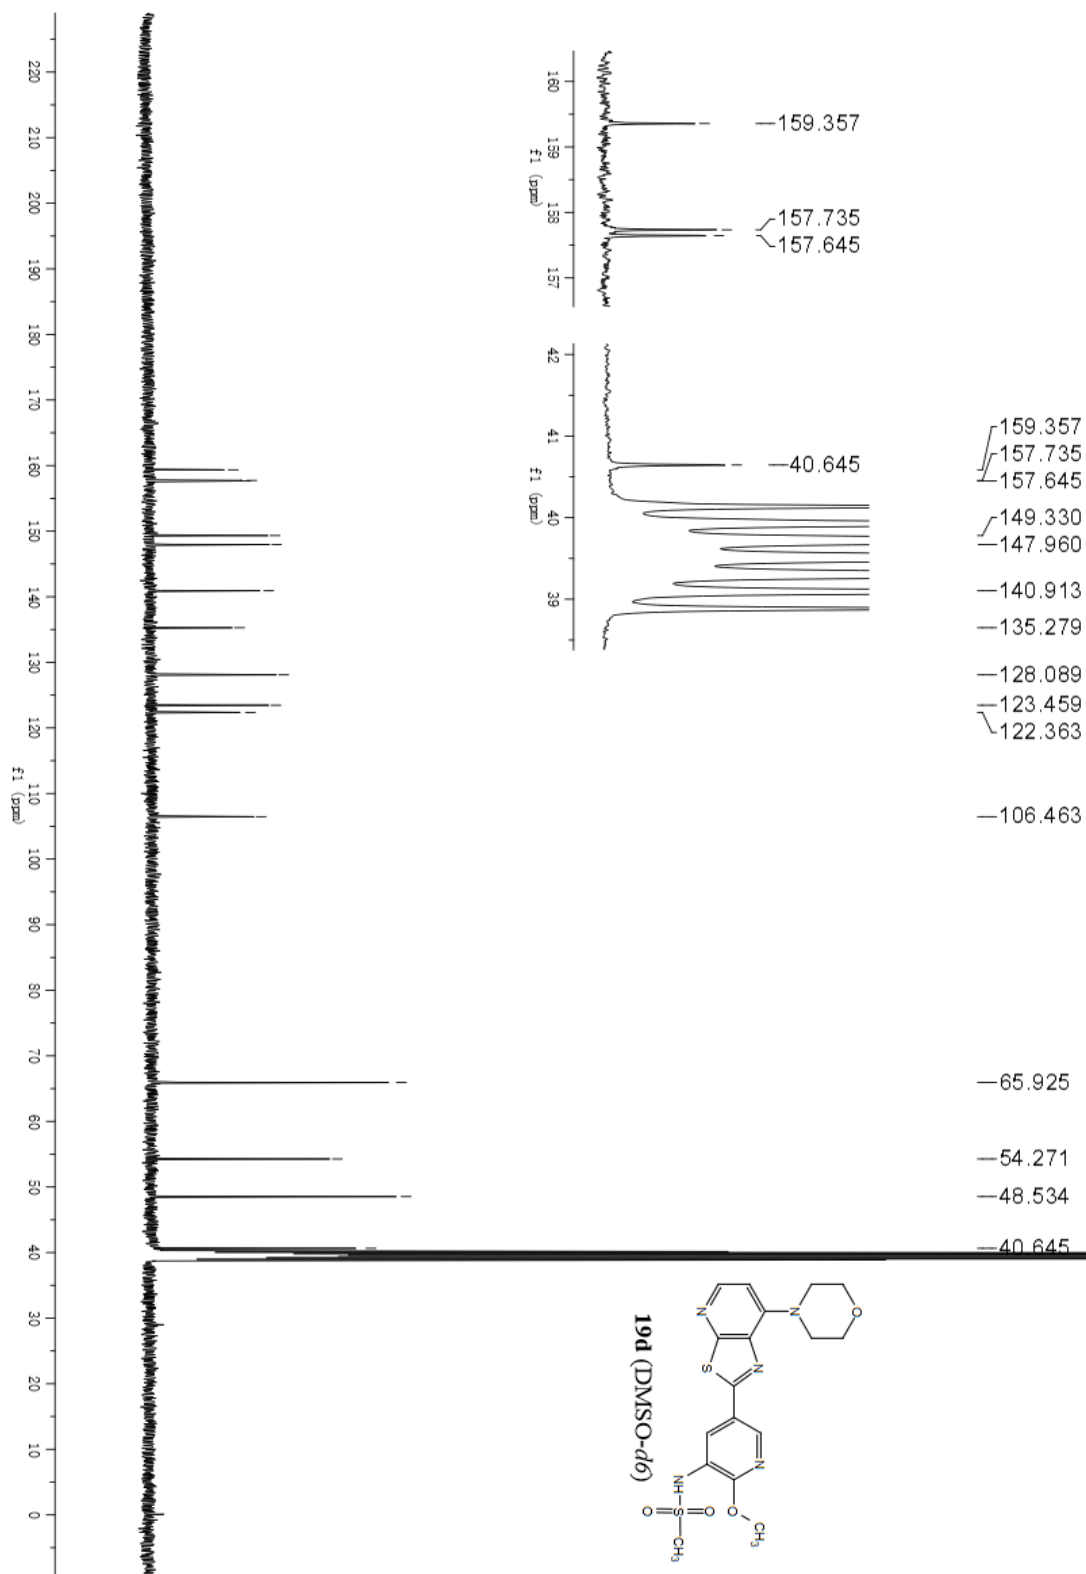

HPLC spectrum of 19d

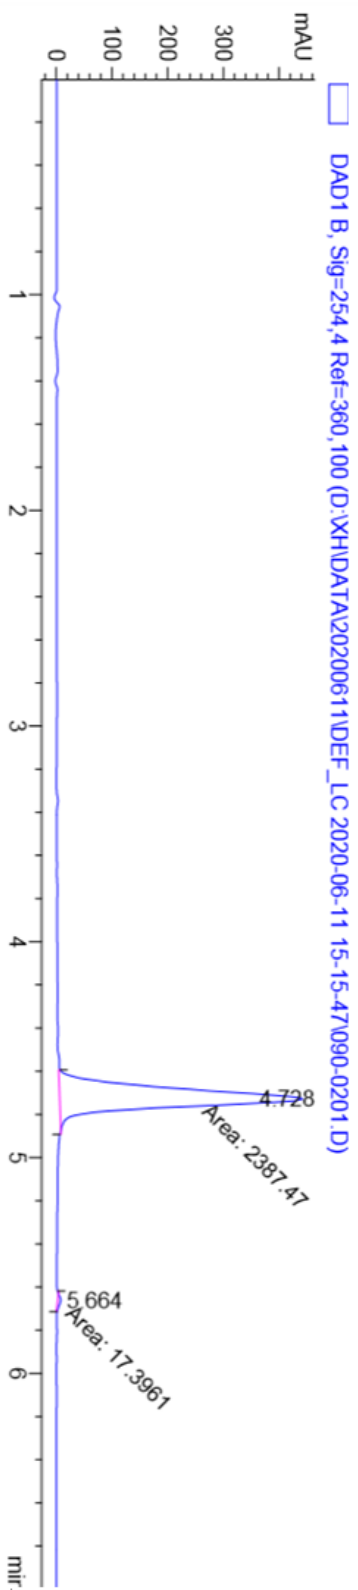

Signal 2: DAD1 B, Sig=254, 4 Ref=360, 100

| Peak # | RetTime [min] | Type | Width [min] | Area [mAU*s] | Height [mAU] | Area %  |
|--------|---------------|------|-------------|--------------|--------------|---------|
| 1      | 4.728         | MM   | 0.0910      | 2387.46973   | 437.42035    | 99.2766 |
| 2      | 5.664         | MM   | 0.0545      | 17.39607     | 5.31610      | 0.7234  |

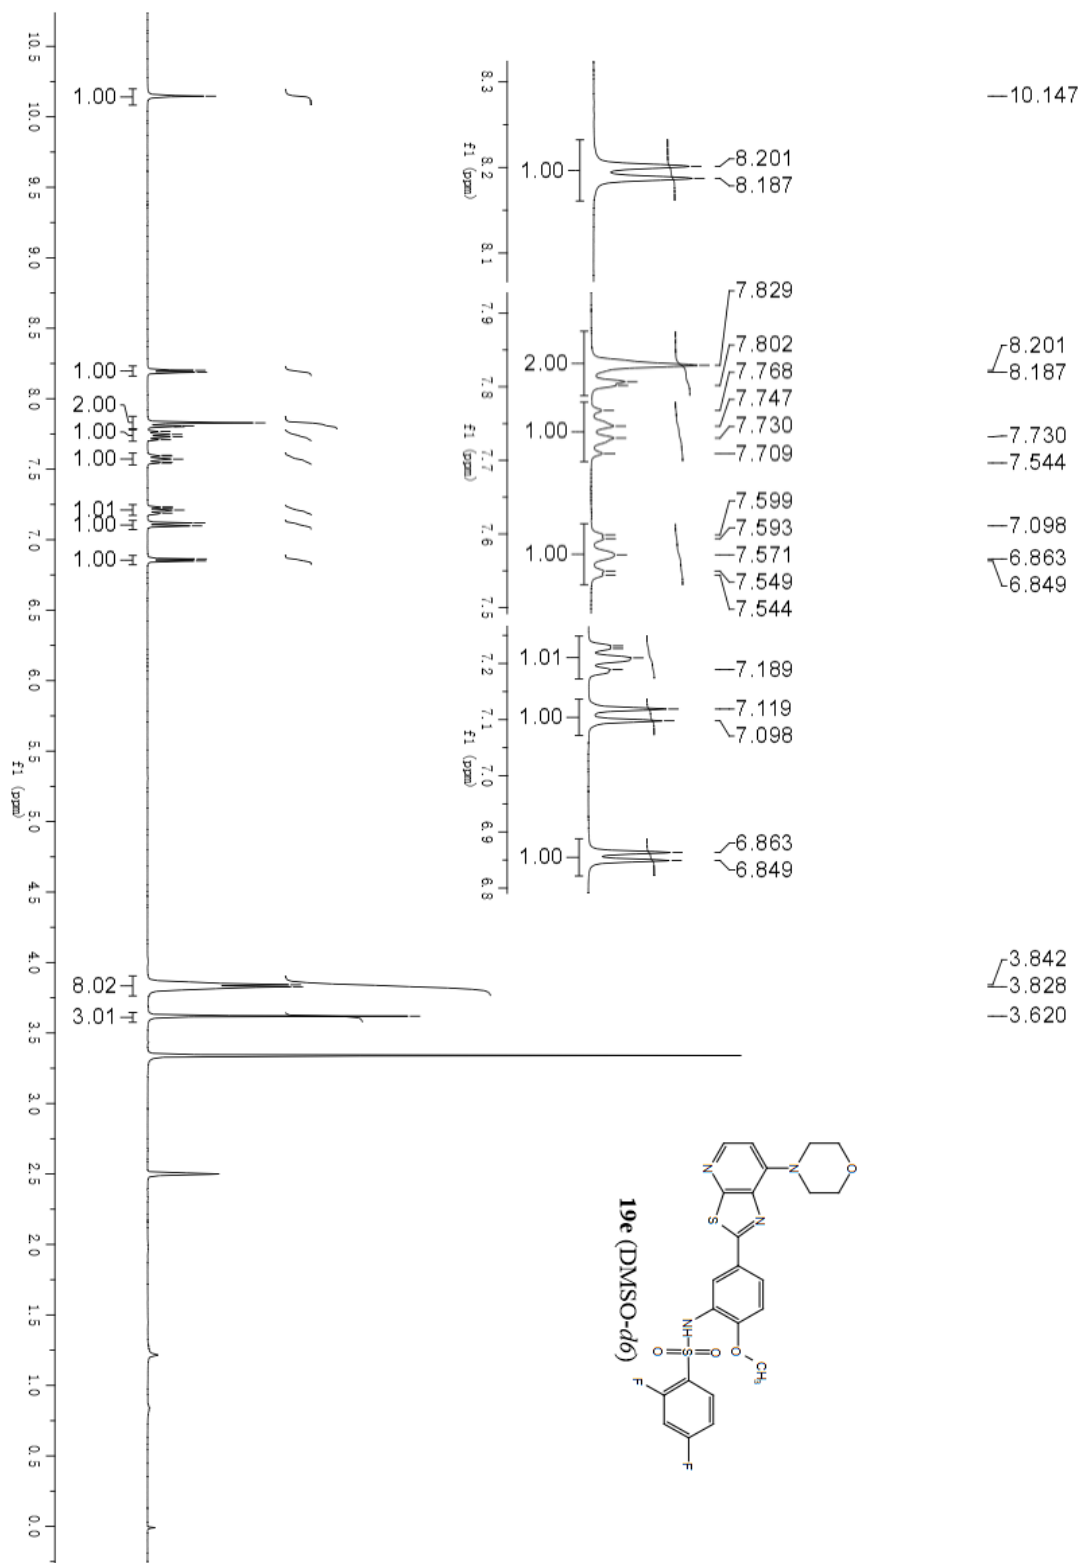

<sup>13</sup>C NMR spectrum of **19e**

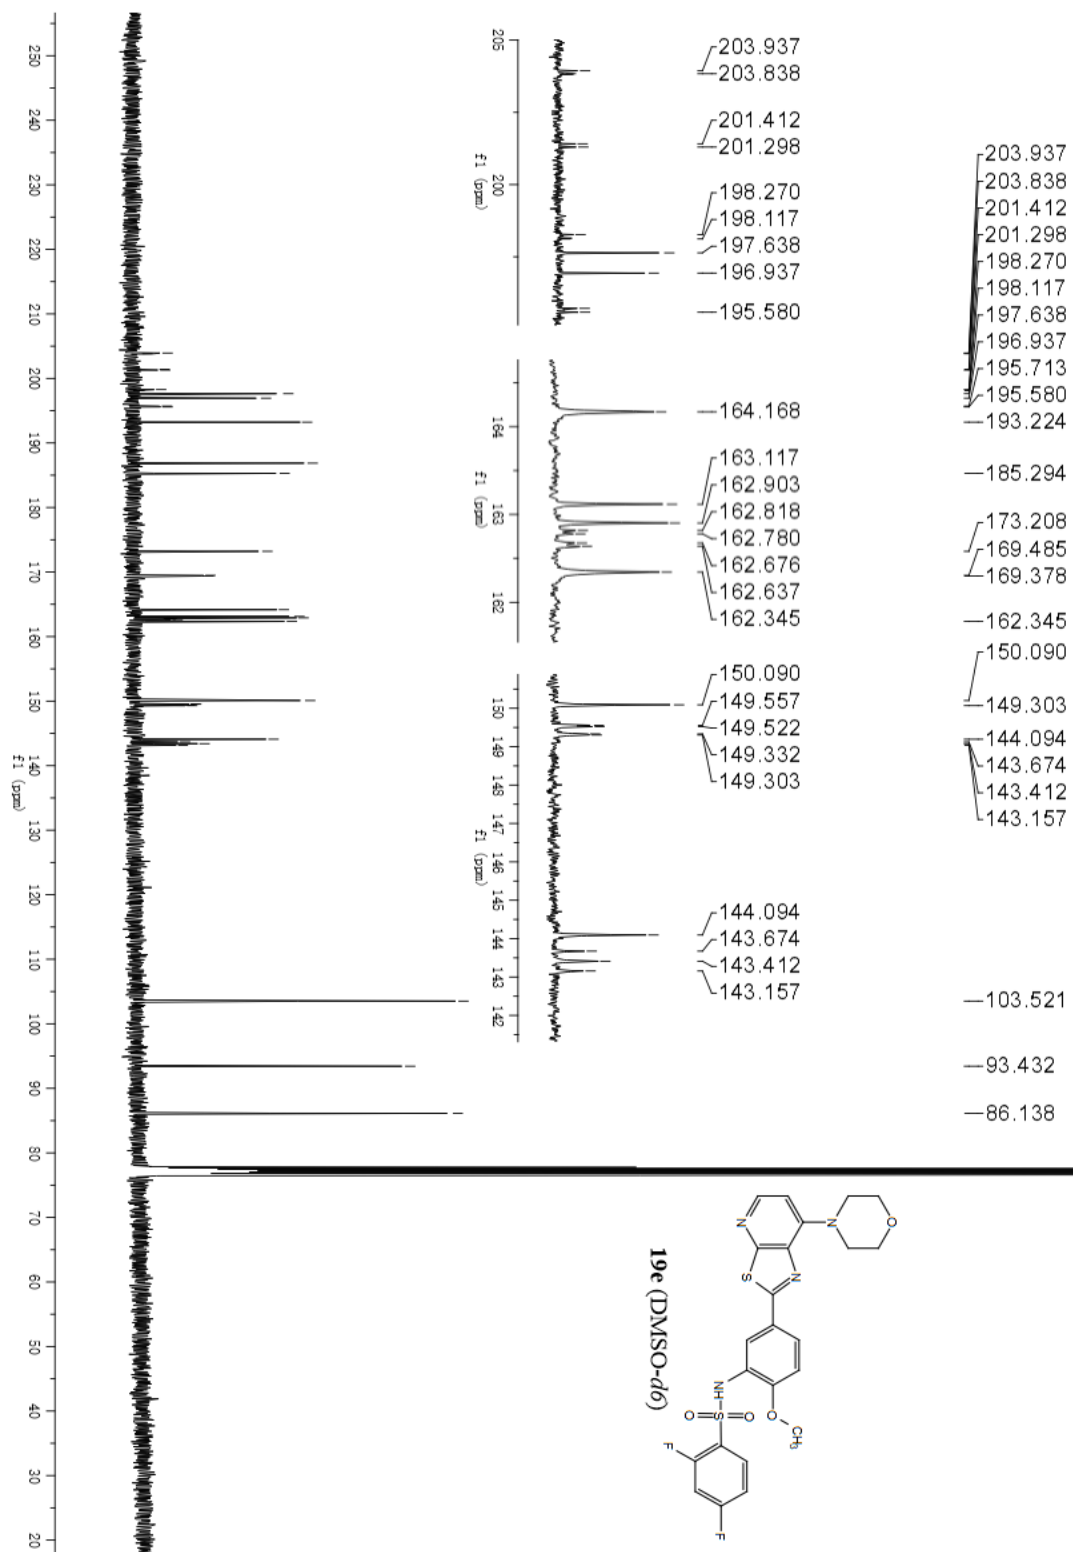



HPLC spectrum of 19e

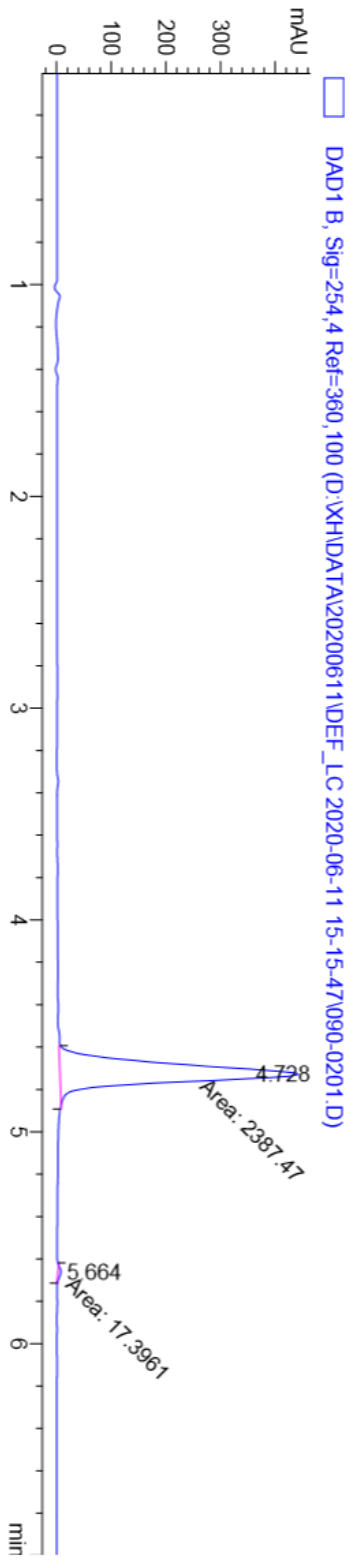

Signal 2: DAD1 B, Sig=254,4 Ref=360,100

| Peak # | RetTime [min] | Type | Width [min] | Area [mAU*s] | Height [mAU] | Area %  |
|--------|---------------|------|-------------|--------------|--------------|---------|
| 1      | 4.728         | NM   | 0.0910      | 2387.46973   | 437.42035    | 99.2766 |
| 2      | 5.664         | NM   | 0.0545      | 17.39607     | 5.31610      | 0.7234  |

<sup>1</sup>H NMR spectrum of **19f**

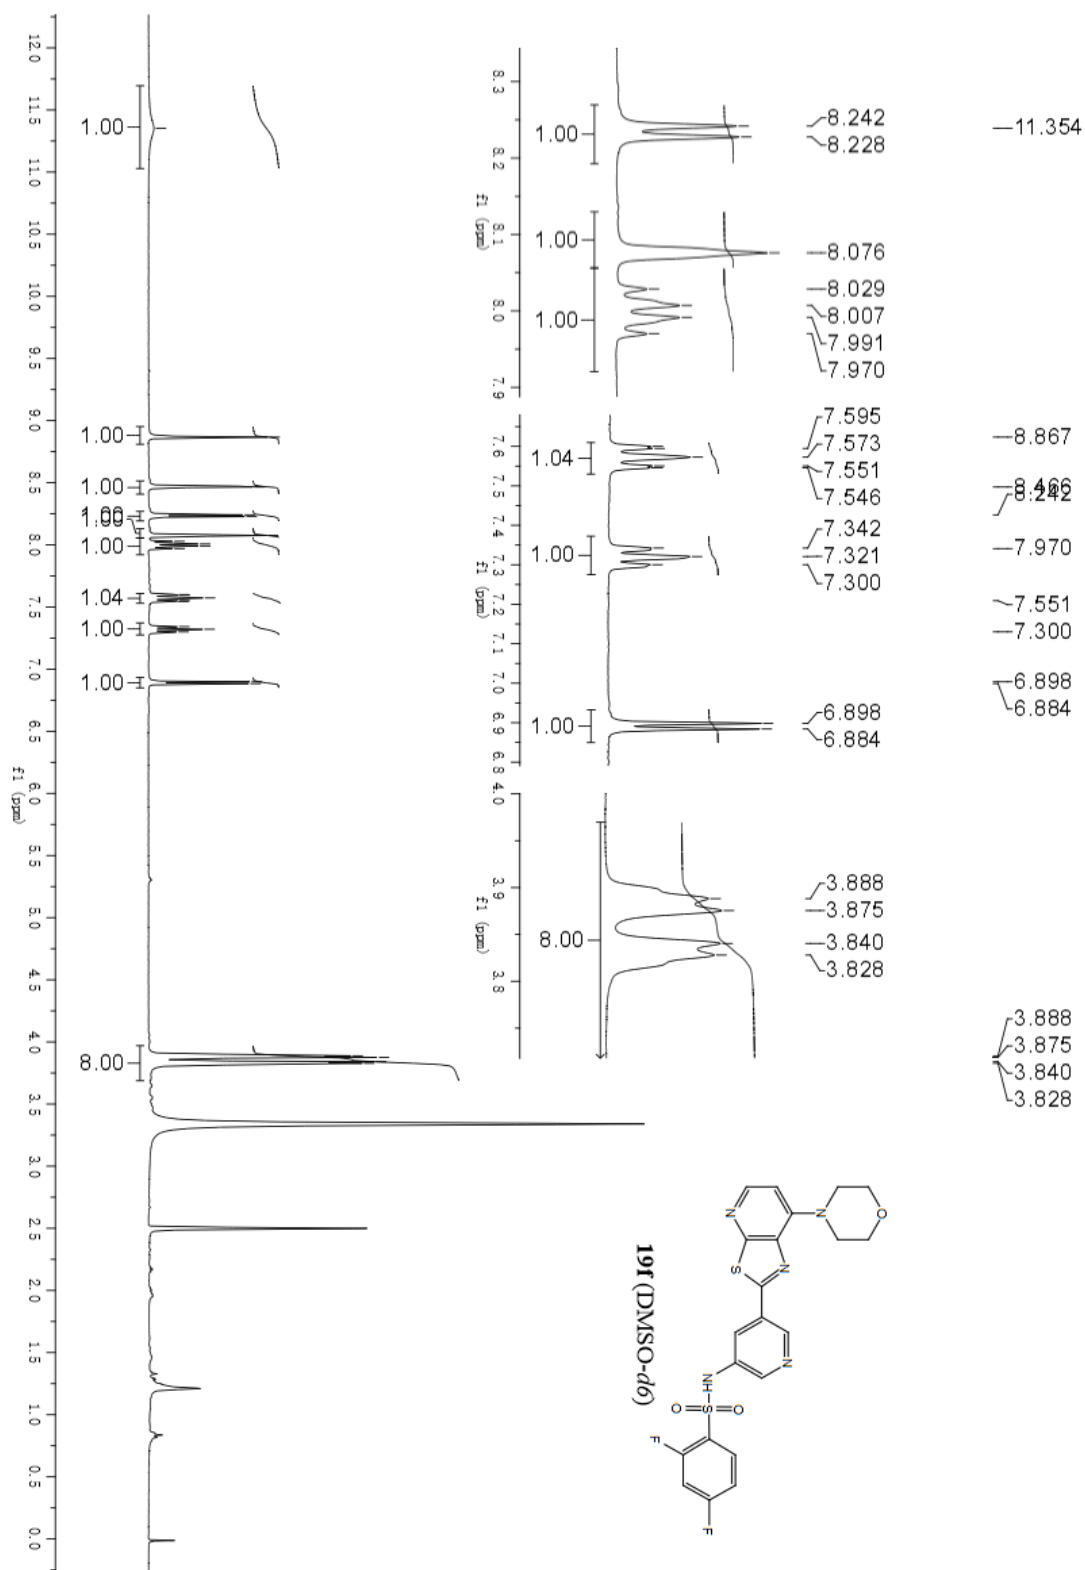

<sup>13</sup>C NMR spectrum of **19f**

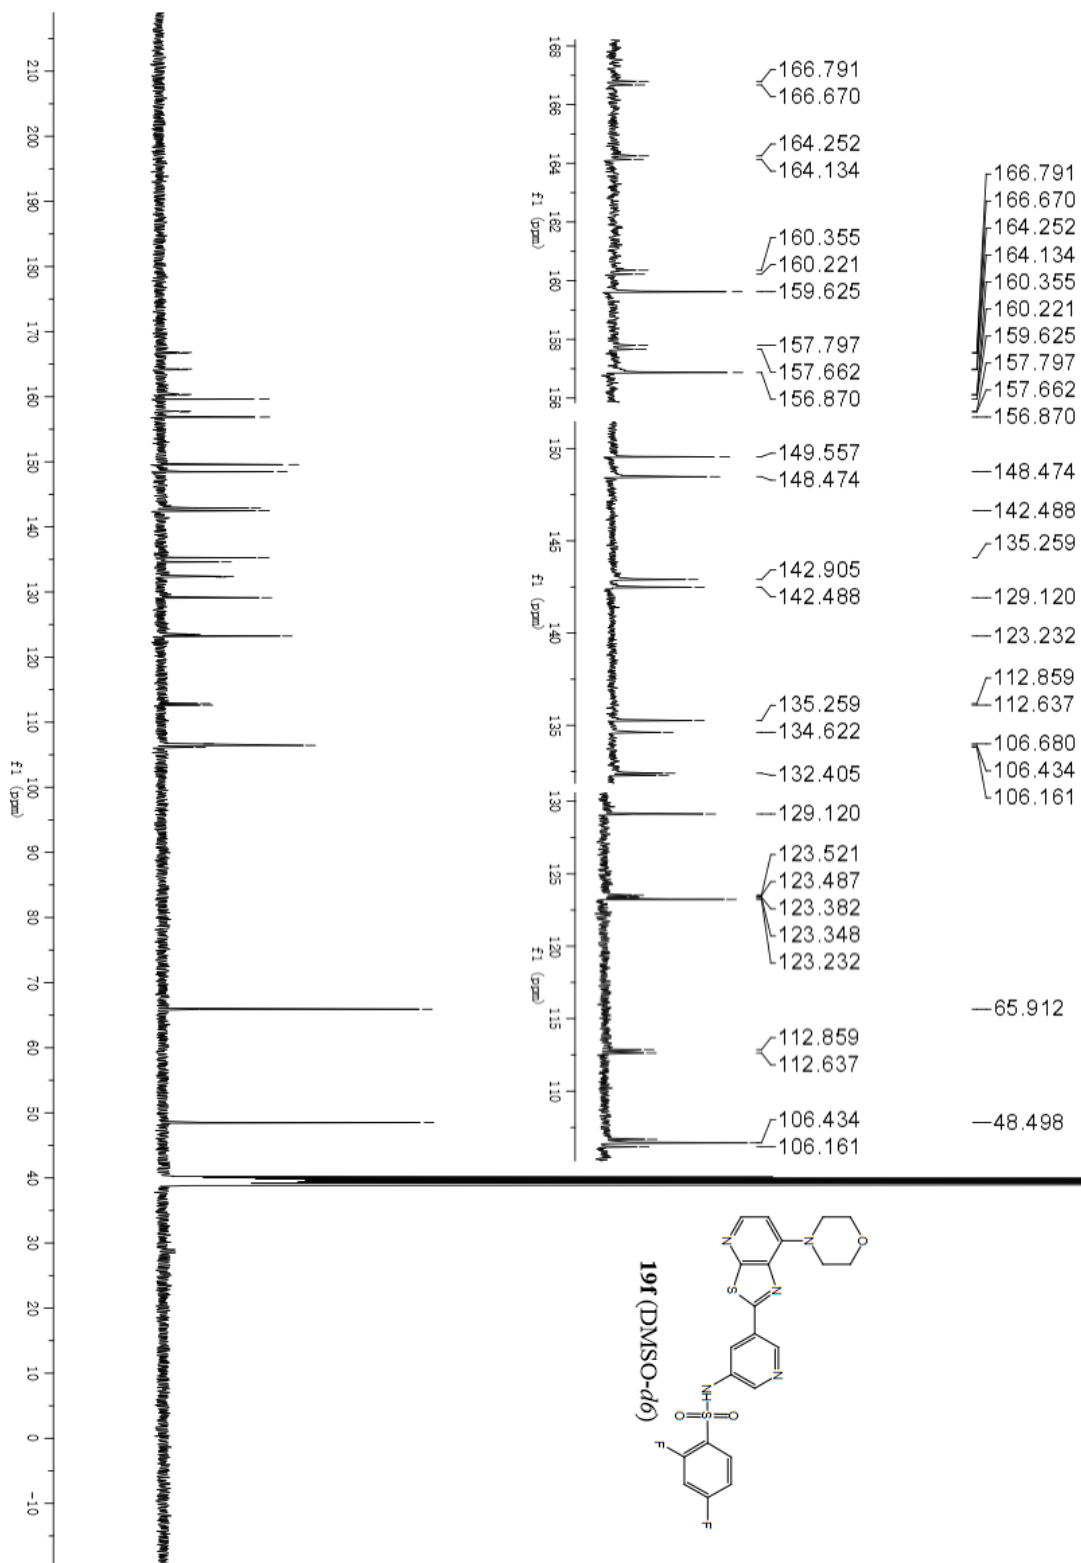

HPLC spectrum of 19f

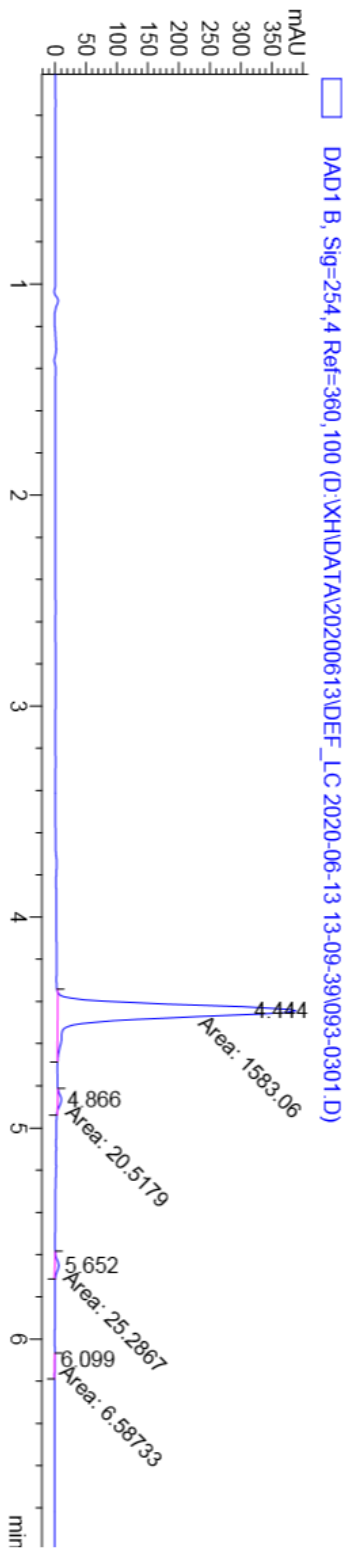

Signal 2: DAD1 B, Sig=254, 4 Ref=360, 100

| Peak # | RetTime [min] | Type | Width [min] | Area [mAU*s] | Height [mAU] | Area %  |
|--------|---------------|------|-------------|--------------|--------------|---------|
| 1      | 4.444         | MM   | 0.0684      | 1583.05725   | 385.95856    | 96.7965 |
| 2      | 4.866         | MM   | 0.0591      | 20.51789     | 5.78970      | 1.2546  |
| 3      | 5.652         | MM   | 0.0668      | 25.28674     | 6.31196      | 1.5462  |
| 4      | 6.099         | MM   | 0.1068      | 6.58733      | 1.02797      | 0.4028  |
